# Supplementary material for: Omalizumab: An Optimal Choice for Patients with Severe Allergic Asthma
Source: MDPI journal article supplement (doi:10.3390/jpm12020165), 2022-01-26
Supplement: s1 [file s1]

**Table S1.** Efficacy of omalizumab in patients with severe allergic asthma.

| Study                           | Design                                                                           | Number of patients | Main outcomes                                                                                                                                                                                                                                                                        |
|---------------------------------|----------------------------------------------------------------------------------|--------------------|--------------------------------------------------------------------------------------------------------------------------------------------------------------------------------------------------------------------------------------------------------------------------------------|
| <b>Busse et al. (2001)</b>      | phase III, double-blinded, placebo-controlled trial                              | 525                | fewer asthma exacerbations per subject with omalizumab vs placebo (0.28 vs 0.54, $p=0.006$ during stable steroid phase and 0.39 vs 0.66, $p=0.003$ during steroid reduction phase)                                                                                                   |
| <b>Solèr et al. (2001)</b>      | multi-center, randomized, double-blind, placebo-controlled, parallel-group study | 546                | omalizumab group vs placebo group: 58% and 525 fewer exacerbations per patients during stable-steroid and steroid-reduction phase ( $p<0.001$ ), comparable overall incidence of adverse events between groups ( $p=0.504$ )                                                         |
| <b>Ayres et al. (2004)</b>      | randomized, open-label, multicenter, parallel-group study                        | 312                | annualized mean number of asthma-deterioration related incidents/mean exacerbation rates with BSC alone vs with omalizumab: 9.76 vs 4.92 ( $p<0.001$ )/ 2.86 vs 1.12 ( $p<0.001$ )                                                                                                   |
| <b>Holgate et al. (2004)</b>    | meta-analysis of three randomized, double-blind, placebo-controlled studies      | 1412               | mean significant exacerbation rate per patient-year: 1.56 with placebo vs 0.69 with omalizumab, $p=0.007$ , omalizumab vs placebo: improvement from baseline in PEFR ( $p=0.026$ ), overall AQLQ ( $p=0.042$ ), mean nocturnal ( $p=0.007$ ) and total ( $p=0.011$ ) asthma symptoms |
| <b>Humbert et al. (2005)</b>    | double-blind, parallel-group, multicenter study                                  | 419                | omalizumab reduced severe asthma exacerbation rate vs placebo (0.24 vs 0.48, $p=0.002$ ) and emergency visit rate (0.24 vs 0.43, $p=0.038$ ), omalizumab significantly improved sthma-related quality of life, morning peak expiratory flow and asthma symptom scores                |
| <b>Brusselle et al. (2009)</b>  | open-label, multicenter, pharmaco-epidemiologic study                            | 158                | >82% improvement in total AQLQ scores of > or = 0.5 points ( $p<0.001$ ), >91% were exacerbation-free ( $p<0.001$ ) at 16 weeks vs >84% improvement in total AQLQ scores of > or = 0.5 points ( $p<0.001$ ), >65% were exacerbation-free ( $p<0.001$ ) at 52 weeks                   |
| <b>Bousquet et al. (2011)</b>   | randomized, open-label, multicenter, parallel-group study                        | 400                | omalizumab-treated patients: improvement in exacerbation rates ( $p<0.001$ ), severe exacerbation rates ( $p<0.05$ ), hospitalizations ( $p<0.05$ ), total emergency visits ( $p<0.05$ ), ACQ score ( $p<0.001$ )                                                                    |
| <b>Barnes et al. (2013)</b>     | 10-center retrospective observational study                                      | 147                | 34% reduction in total OCS prescription at 12 months, improvement in mean FEV <sub>1</sub> at 16 weeks (62,94 vs 70,98, $p<0.01$ ), reduction in healthcare utilization at 12 months ( $p<0.05$ )                                                                                    |
| <b>Deschildre et al. (2013)</b> | 1-year real life multicenter survey                                              | 104                | decrease in exacerbations (4.4 to 1.25 per patient after 1 year), decrease in hospitalizations by 88.5%, mean improvement of lung function: 4.9% pred. for FEV <sub>1</sub> 95% CI, $p<0.05$ ) and 9.5% pred. for FEF <sub>25-75</sub> (95% CI, $p<0.05$ )                           |
| <b>Braunstahl et al. (2013)</b> | international, single-arm, open-label, observational study                       | 943                | no clinically significant or severe clinically significant asthma exacerbations higher at 12 months (82.4% and 95.8%) and 24 months (81.9% and 95.6%) vs pre-treatment period (4.9% and 27.4%), improvement in activity limitation (41.7%)                                           |

|                                |                                                                  |      |                                                                                                                                                                                                                                                                                                                                                     |
|--------------------------------|------------------------------------------------------------------|------|-----------------------------------------------------------------------------------------------------------------------------------------------------------------------------------------------------------------------------------------------------------------------------------------------------------------------------------------------------|
|                                |                                                                  |      | at 24 months vs 46.6% at 12 months, $p<0,05$ ) and in rescue medication use (49.8% at 24 months vs 54.1% at 12 months, $p<0,05$ )                                                                                                                                                                                                                   |
| <b>Molimard et al. (2014)</b>  | observational, descriptive, cross-sectional, retrospective study | 61   | loss of asthma control in 34 patients (55.7%) with a median interval between discontinuation and loss of control of 13.0 months (mean $20.4 \pm 2.6$ [95% CI: 8.3-28.1])                                                                                                                                                                            |
| <b>Sposato et al. (2016)</b>   | multi-center, observational study                                | 105  | improvement in ACT values ( $p<0.001$ ; comparing pre-post) in each group (pre values: 15 [IQR:12-18]; 14 [IQR:10-16]; 15 [IQR:12-16]; post-values: 24 [IQR:22-25]; 21 [IQR:20-23]; 20 [IQR:18-22]; measured in young, middle-aged and elderly subjects), reduction in exacerbations and ICS treatment after omalizumab in each group ( $p<0.001$ ) |
| <b>Iribarren et al. (2017)</b> | observational study                                              | 7836 | omalizumab-treated patients had a higher rate of CV/CBV serious adverse events (13.4 per 1,000 person years [PYs]) than did non-omalizumab-treated patients (8.1 per 1,000 PYs), ATE rates per 1,000 PYs were 6.66 (101 patients/15,160 PYs) in the omalizumab cohort and 4.64 (46 patients/9,904 PYs) in the non-omalizumab cohort                 |
| <b>Ke et al. (2018)</b>        | retrospective observational cohort study                         | 1564 | asthma-related medication use decreased from the preindex to the postindex periods (oral corticosteroids, $p < 0.001$ ; ICSs, $p < 0.001$ ; LABAs, $p = 0.009$ ; ICS-LABA combination, $p < 0.001$ ; leukotriene modifiers, $p < 0.001$ ), the proportion of patients with any asthma exacerbations decreased by 33.6% ( $p < 0.001$ )              |
| <b>Al-Ahmad et al. (2018)</b>  | 4-year observational study                                       | 65   | ICS/LABA dose significantly reduced from 65 (100%) to 25 (38.5%) after 4 years of treatment ( $p < 0.001$ ); ACT scores significantly increased from $15 \pm 3$ at baseline to $23 \pm 3$ ( $p < 0.001$ ) and FEV1 level from $55.6 \pm 10.6$ to $76.63 \pm 10.34$ at year 4                                                                        |
| <b>Oliveira et al. (2018)</b>  | non-interventional, prospective study                            | 32   | at 12 months of omalizumab: improvement in BMI, number of exacerbations, rescue medication, disease control and lung function ( $p<0,05$ )                                                                                                                                                                                                          |

**Table S2.** Common adverse events of the use of Omalizumab in asthmatic patients.

| Adverse Effects                                                 |              |
|-----------------------------------------------------------------|--------------|
| Local reactions to the injection site (i.e., redness, swelling) | 45%          |
| Viral infections                                                | 23%          |
| Upper respiratory tract infections                              | 20%          |
| Sinusitis                                                       | 16%          |
| Headache                                                        | 15%          |
| Anaphylactic reactions                                          | 0.09 to 0.2% |
